# Supplementary material for: Activity of carbon electrodes towards oxygen reduction in acid: A comparative study
Source: Royal Society of Chemistry journal article supplement (doi:10.1039/c1nj20612e), 2011-01-01
Supplement: c1nj20612e.pdf [file c1nj20612e.pdf]

### Electronic Supplementary Information

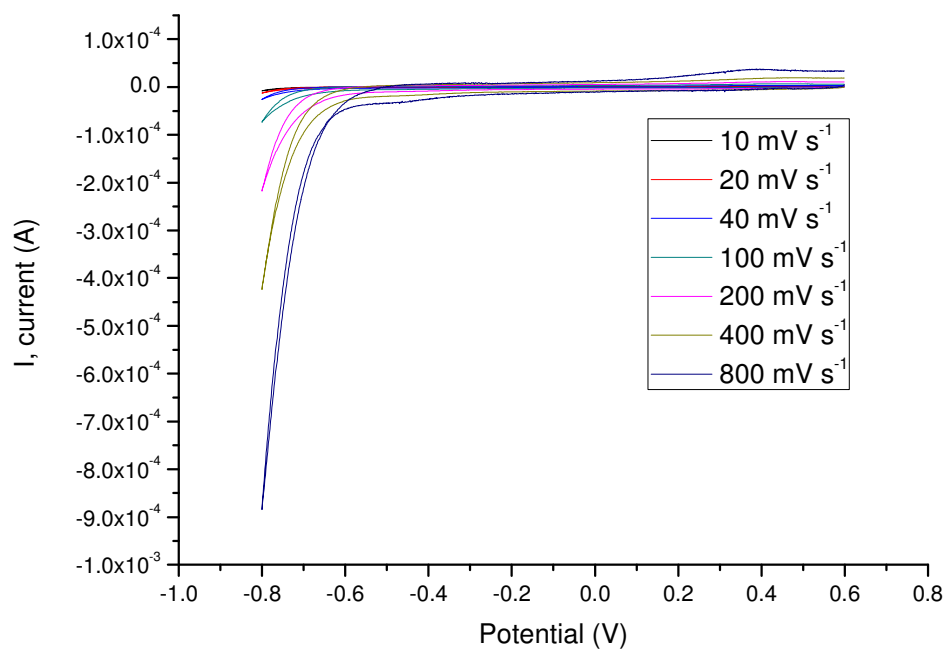

**S1** Voltammograms taken at scan rates of 800, 400, 200, 100, 40, 200, 10  $\text{mV s}^{-1}$ , on a 0.5cm EPPG electrode in an  $\text{N}_2$  saturated 0.1M  $\text{H}_2\text{SO}_4$  solution. The potential was swept from 0.6 to -0.8V Vs saturated calomel electrode (SCE)

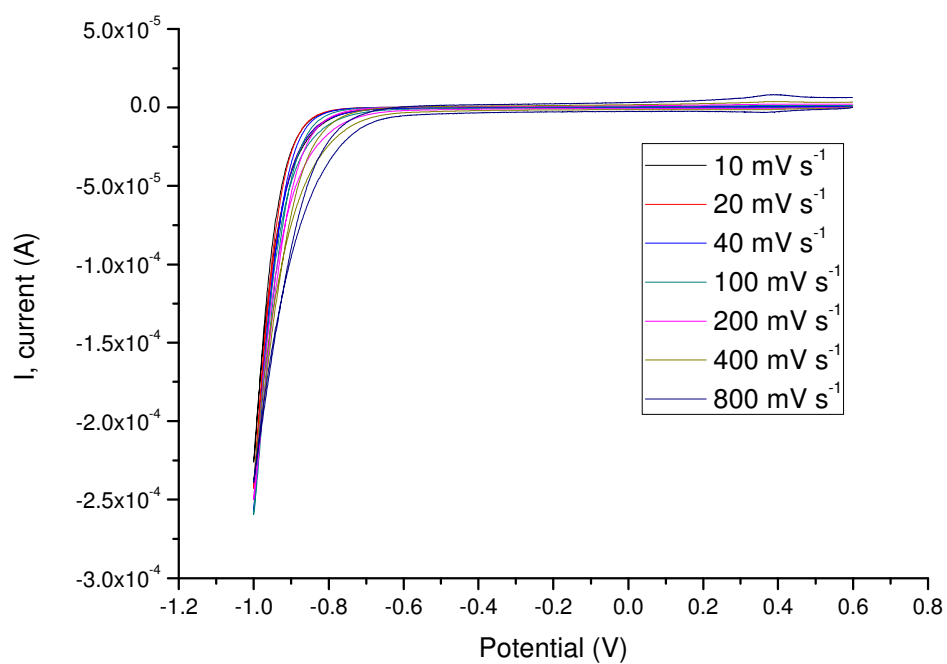

**S2** Voltammograms taken at scan rates of 800, 400, 200, 100, 40, 200, 10  $\text{mV s}^{-1}$ , on a 0.5cm BPPG electrode in an  $\text{N}_2$  saturated 0.1M  $\text{H}_2\text{SO}_4$  solution. The potential was swept from 0.6 to -1.0V Vs saturated calomel electrode (SCE)

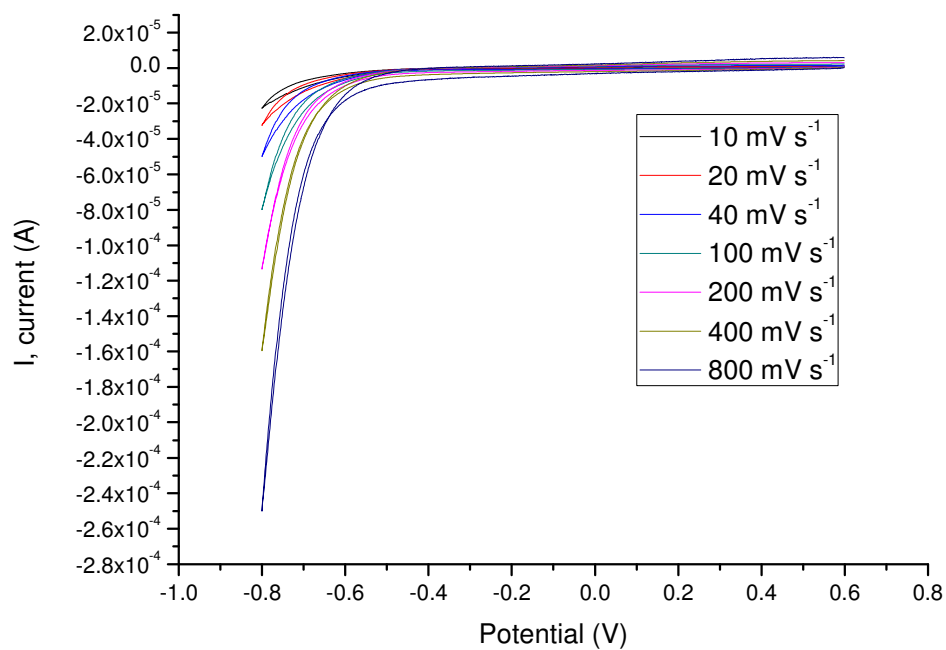

**S3** Voltammograms taken at scan rates of 800, 400, 200, 100, 40, 200, 10  $\text{mV s}^{-1}$ , on a 0.3cm GC electrode in an  $\text{N}_2$  saturated 0.1M  $\text{H}_2\text{SO}_4$  solution. The potential was swept from 0.6 to -0.8V Vs saturated calomel electrode (SCE)

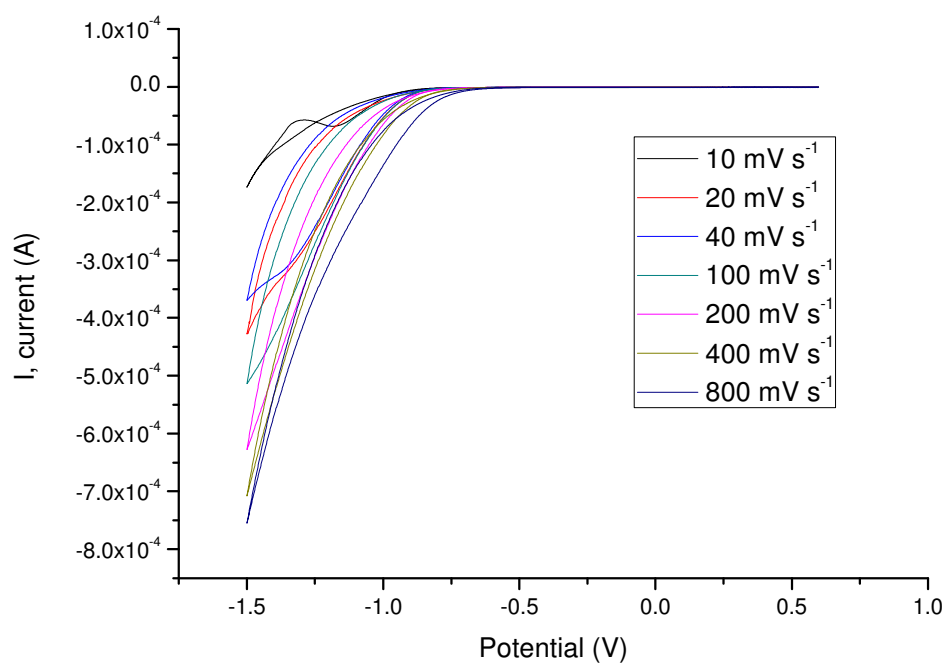

**S4** Voltammograms taken at scan rates of 800, 400, 200, 100, 40, 200, 10  $\text{mV s}^{-1}$ , on a 0.5 cm BDD electrode in an  $\text{N}_2$  saturated 0.1 M  $\text{H}_2\text{SO}_4$  solution. The potential was swept from 0.6 to -1.5 V vs saturated calomel electrode (SCE.)

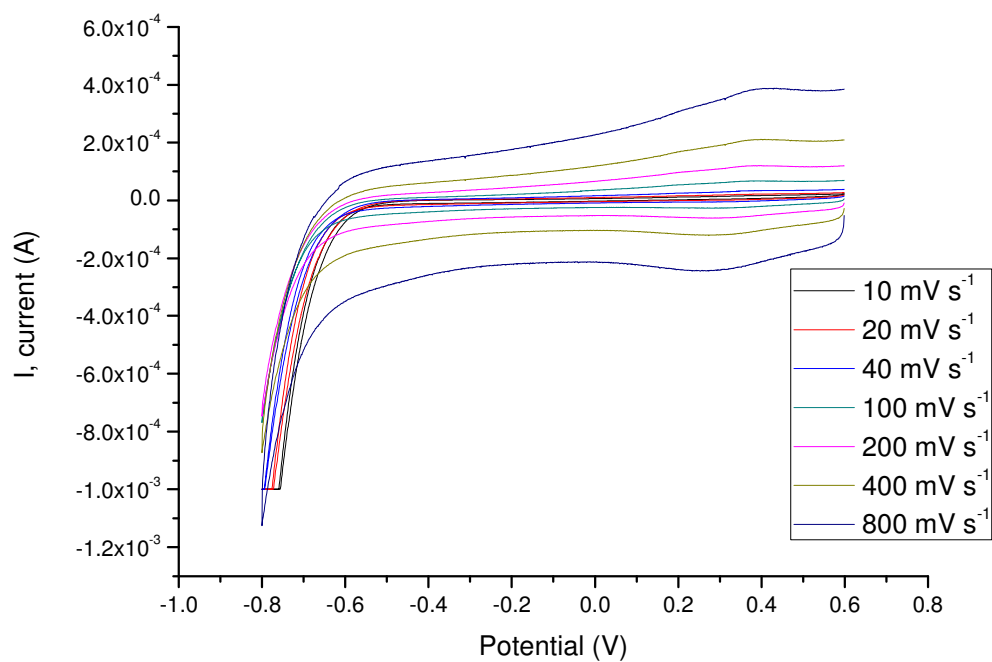

**S5** Voltammograms taken at scan rates of 800, 400, 200, 100, 40, 200, 10 mV s<sup>-1</sup>, on a 0.5 cm SWCNT modified BPPG electrode in an N<sub>2</sub> saturated 0.1 M H<sub>2</sub>SO<sub>4</sub> solution. The potential was swept from 0.6 to -0.8 V vs saturated calomel electrode (SCE)

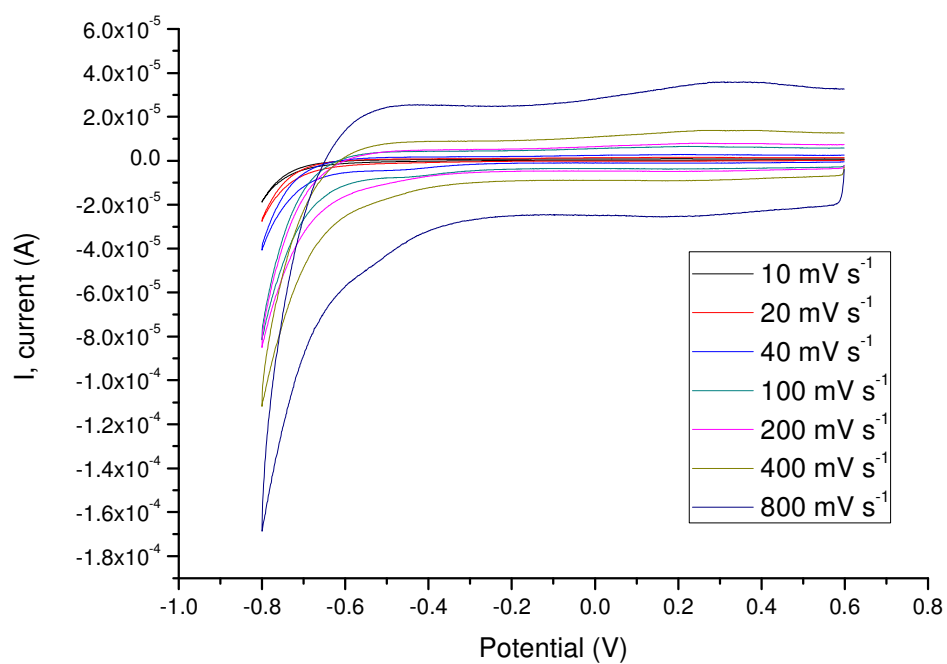

**S6** Voltammograms taken at scan rates of 800, 400, 200, 100, 40, 200, 10 mV s<sup>-1</sup>, on a 0.5 cm H-MWCNT modified BPPG electrode in an N<sub>2</sub> saturated 0.1 M H<sub>2</sub>SO<sub>4</sub> solution. The potential was swept from 0.6 to -0.8 V vs saturated calomel electrode (SCE)

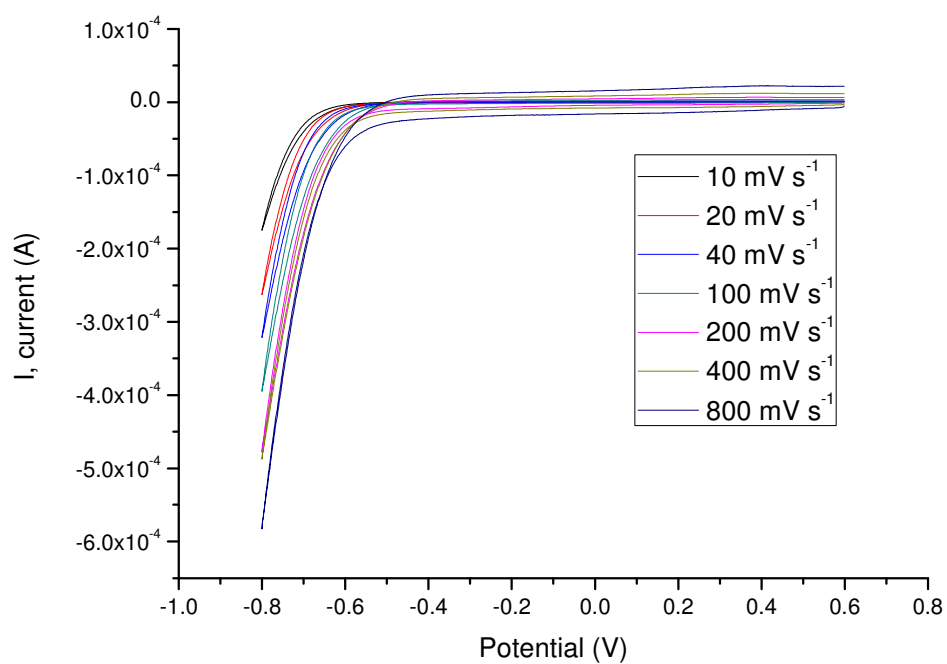

**S7** Voltammograms taken at scan rates of 800, 400, 200, 100, 40, 200,  $10 \text{ mV s}^{-1}$ , on a 0.5cm B-MWCNT modified BPPG electrode in an  $\text{N}_2$  saturated  $0.1 \text{ M H}_2\text{SO}_4$  solution. The potential was swept from 0.6 to -0.8V Vs saturated calomel electrode (SCE)
